# Supplementary material
Source: PubMed Central journal article supplement (PMC1472517)

A.

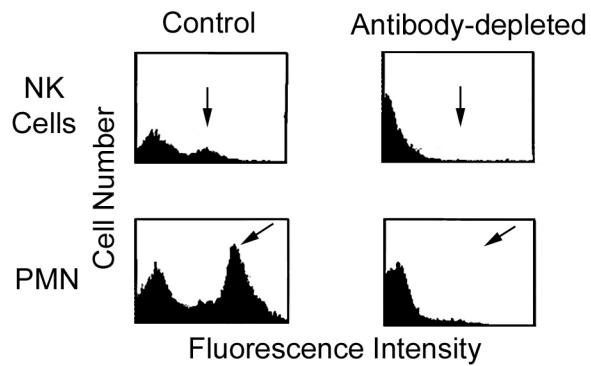

C.

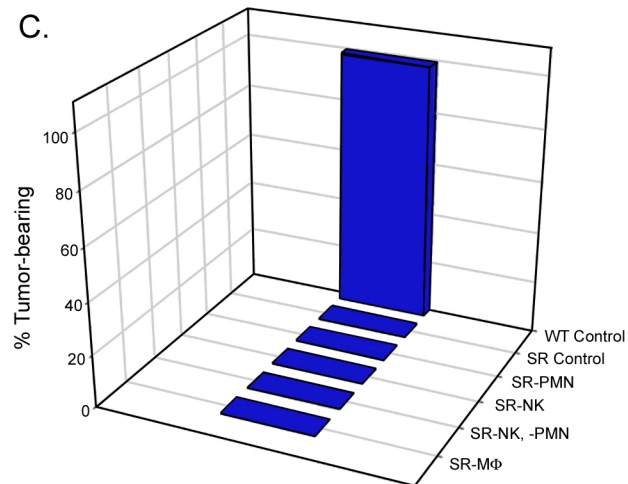

B.

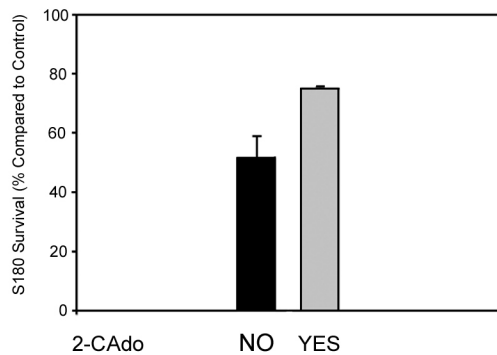

Supplement: pnas_0602382103_1.pdf [file pnas_0602382103_1.pdf]
